# Supplementary material for: High capacity clinical SARS-CoV-2 molecular testing using combinatorial pooling
Source: Research Square preprint supplement (doi:10.21203/rs.3.rs-2480849/v1), 2023-01-30
Supplement: Supplementary file 1 [file c7b39175be1663cdad2fbfa8.pdf]

## Supplementary Materials:

Supplementary Figs. 1 to 2

Supplementary Tables 1 to 2

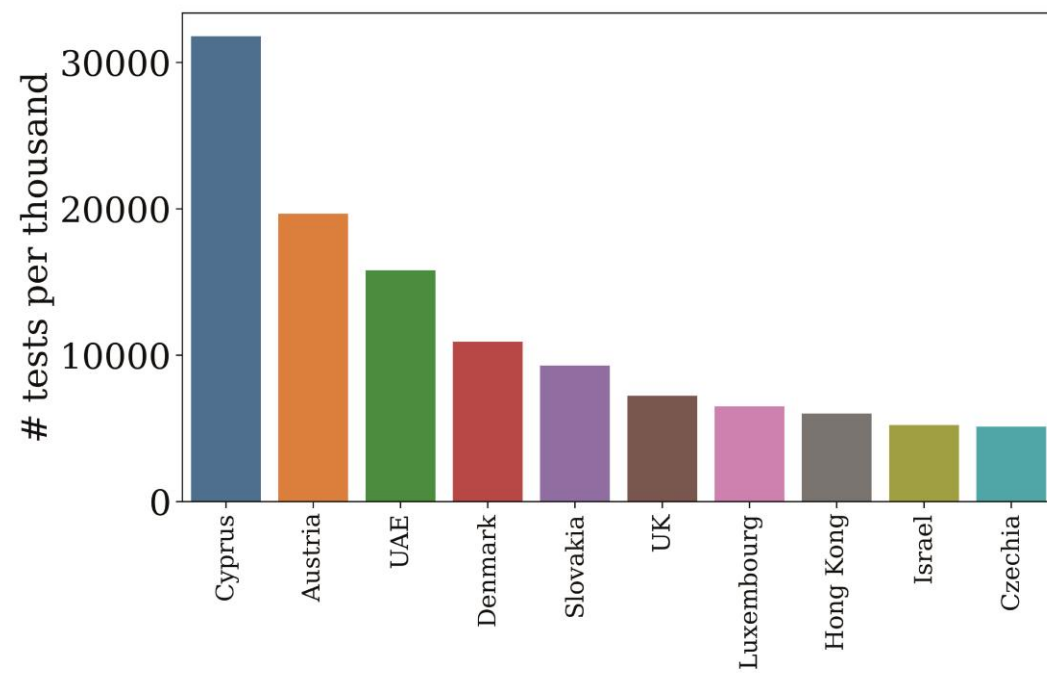

**Supplementary Fig. 1:** Total PCR tests performed per 1,000 individuals by country - 31.3.2022

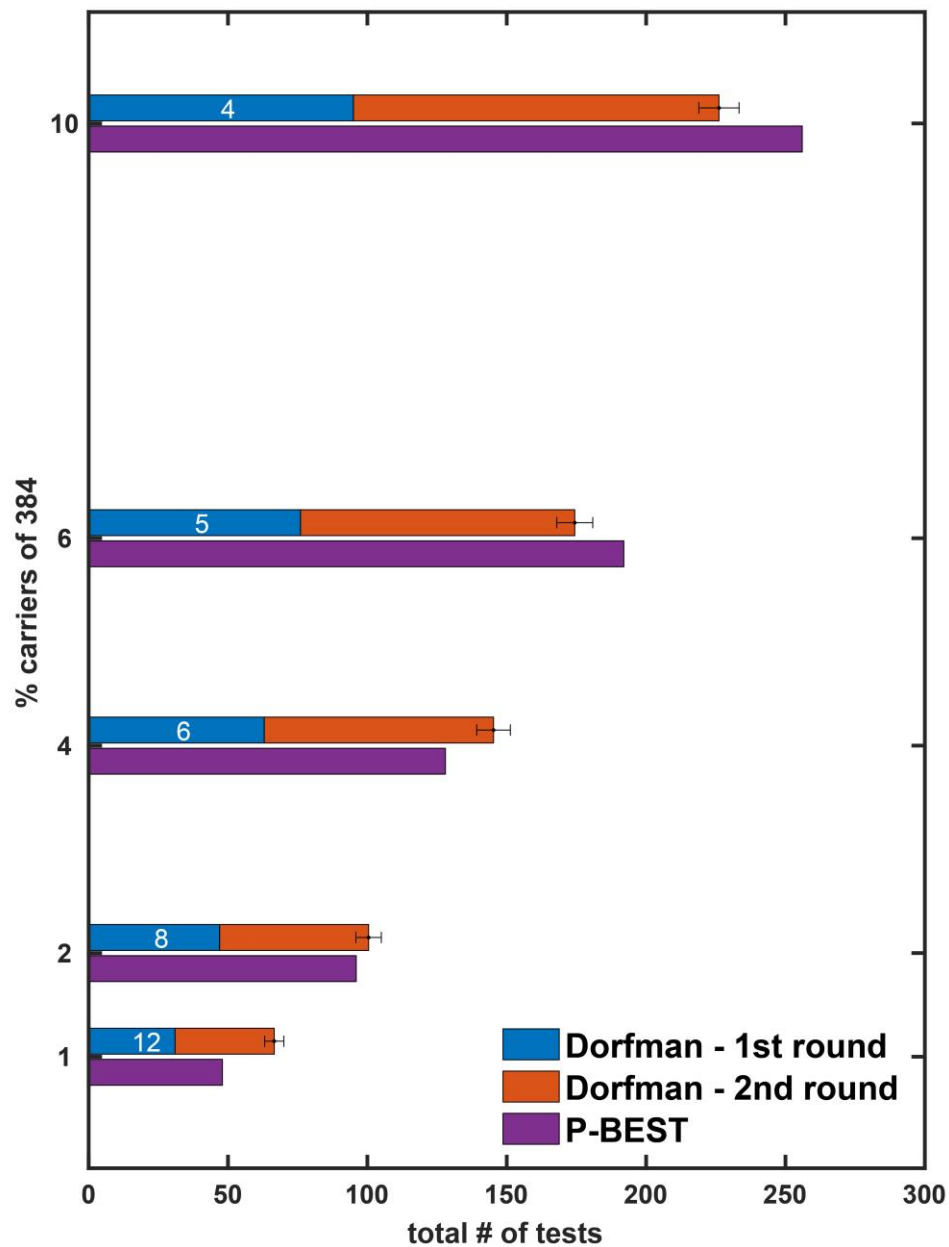

**Supplementary Fig. 1: Comparison of the number of tests of the two-stage Dorfman pooling method vs. P-BEST.** The total number of tests performed for screening 384 samples via standard two-stage Dorfman pooled-testing and in P-BEST. Shown are data for five positivity rates - 1%, 2%, 4%, 6% and 10%. Dorfman pooling: Shown are the number of tests performed in the first and second rounds of Dorfman pooling (blue and red bars, respectively). The Dorfman pool size (shown inside the blue bar) was optimized

to minimize the total number of tests. Dorfman results are based on 10,000 random simulations; error bars correspond to the standard deviations. P-BEST: The total number of tests performed by P-BEST is, in some cases, higher than the number required by Dorfman, yet the number of tests performed in Dorfman's second stage makes it prohibitive in many realistic scenarios.

**Supplementary Table 1: Side by side data**

| Validation num | #samples | #pools | Date     | Positive samples in the run |               |                |                | Negative samples in the run |                |               |                 | Weak positive sample in the run |                    |                     |                     |
|----------------|----------|--------|----------|-----------------------------|---------------|----------------|----------------|-----------------------------|----------------|---------------|-----------------|---------------------------------|--------------------|---------------------|---------------------|
|                |          |        |          | # positive                  | True positive | False negative | True suspected | # negative                  | False positive | True negative | False suspected | #week positive                  | Weak true positive | Weak false negative | Weak true suspected |
| 1              | 96       | 25     | 24/11/20 | 2                           | 0             |                | 2              | 94                          |                | 94            | 0               |                                 |                    |                     |                     |
| 2              | 96       | 25     | 26/11/20 | 2                           | 1             |                | 1              | 94                          |                | 92            | 2               |                                 |                    |                     |                     |
| 3              | 96       | 25     | 26/11/20 | 2                           | 1             | 1              | 0              | 94                          |                | 91            | 3               |                                 |                    |                     |                     |
| 4              | 96       | 25     | 26/11/20 | 2                           | 2             |                | 0              | 93                          |                | 93            | 0               | 1                               |                    | 1                   |                     |
| 5              | 96       | 25     | 27/11/20 | 2                           | 0             |                | 2              | 93                          |                | 93            | 0               | 1                               |                    |                     | 1                   |
| 6              | 96       | 25     | 12/1/20  | 2                           | 1             |                | 1              | 94                          |                | 94            | 0               |                                 |                    |                     |                     |
| 7              | 96       | 25     | 12/1/20  | 2                           | 2             |                | 0              | 94                          |                | 94            | 0               |                                 |                    |                     |                     |
| 8              | 96       | 25     | 27/11/20 | 3                           | 2             |                | 1              | 93                          |                | 91            | 2               |                                 |                    |                     |                     |
| 9              | 96       | 25     | 27/11/20 | 3                           | 3             |                | 0              | 93                          |                | 91            | 2               |                                 |                    |                     |                     |
| 10             | 96       | 25     | 27/11/20 | 3                           | 2             |                | 1              | 93                          |                | 93            | 0               |                                 |                    |                     |                     |
| 11             | 96       | 25     | 27/11/20 | 3                           | 3             |                | 0              | 93                          |                | 90            | 3               |                                 |                    |                     |                     |
| 12             | 96       | 25     | 12/1/20  | 3                           | 3             |                | 0              | 93                          |                | 93            | 0               |                                 |                    |                     |                     |
| 13             | 96       | 25     | 12/1/20  | 3                           | 2             |                | 1              | 93                          |                | 91            | 2               |                                 |                    |                     |                     |
| 14             | 96       | 25     | 27/11/20 | 1                           | 0             |                | 1              | 94                          |                | 90            | 4               | 1                               |                    | 1                   |                     |
| 15             | 96       | 25     | 27/11/20 | 2                           | 1             |                | 1              | 93                          |                | 91            | 2               | 1                               |                    |                     | 1                   |
| 16             | 96       | 25     | 27/11/20 | 2                           | 1             |                | 1              | 93                          |                | 92            | 1               | 1                               |                    | 1                   |                     |
| 17             | 96       | 25     | 12/1/20  | 2                           | 1             |                | 1              | 93                          |                | 90            | 3               | 1                               |                    |                     | 1                   |
| 18             | 96       | 25     | 12/1/20  | 1                           | 1             |                | 0              | 93                          |                | 90            | 3               | 2                               |                    | 1                   | 1                   |
| 19             | 96       | 25     | 12/1/20  | 2                           | 0             |                | 2              | 93                          |                | 90            | 3               | 1                               |                    |                     | 1                   |
| 20             | 96       | 46     | 18/1/21  | 7                           | 7             |                | 0              | 89                          |                | 86            | 3               |                                 |                    |                     |                     |
| 21             | 96       | 46     | 18/1/21  | 5                           | 5             |                | 0              | 91                          |                | 85            | 6               |                                 |                    |                     |                     |
| 22             | 96       | 46     | 18/1/21  | 6                           | 2             |                | 4              | 90                          |                | 88            | 2               |                                 |                    |                     |                     |
| 23             | 372      | 186    | 25/1/21  | 19                          | 11            |                | 8              | 351                         |                | 333           | 18              | 2                               |                    | 1                   | 1                   |
| 24             | 96       | 46     | 18/1/21  | 4                           | 4             |                | 0              | 92                          |                | 92            | 0               |                                 |                    |                     |                     |
| 25             | 96       | 46     | 18/1/21  | 5                           | 5             |                | 0              | 91                          |                | 91            | 0               |                                 |                    |                     |                     |
| 26             | 96       | 46     | 18/1/21  | 6                           | 3             |                | 3              | 90                          |                | 90            | 0               |                                 |                    |                     |                     |
| 27             | 96       | 46     | 21/1/21  | 6                           | 4             |                | 2              | 90                          |                | 90            | 0               |                                 |                    |                     |                     |
| 28             | 96       | 46     | 26/1/21  | 6                           | 4             |                | 2              | 90                          |                | 79            | 11              |                                 |                    |                     |                     |
| 29             | 96       | 46     | 26/1/21  | 3                           | 2             |                | 1              | 93                          |                | 83            | 10              |                                 |                    |                     |                     |
| 30             | 96       | 46     | 4/2/21   | 6                           | 4             |                | 2              | 90                          |                | 88            | 2               |                                 |                    |                     |                     |
| 31             | 96       | 46     | 4/2/21   | 3                           | 1             |                | 2              | 92                          |                | 87            | 5               | 1                               |                    |                     | 1                   |
| 32             | 96       | 46     | 4/2/21   | 5                           | 5             |                | 0              | 90                          |                | 89            | 1               | 1                               |                    |                     | 1                   |
| 33             | 96       | 46     | 7/2/21   | 6                           | 6             |                | 0              | 90                          |                | 88            | 2               |                                 |                    |                     |                     |
| 34             | 96       | 46     | 7/2/21   | 6                           | 6             |                | 0              | 90                          |                | 89            | 1               |                                 |                    |                     |                     |
| 35             | 96       | 46     | 7/2/21   | 6                           | 2             |                | 4              | 90                          |                | 82            | 8               |                                 |                    |                     |                     |
| Total          | 3636     | 1351   |          | 141                         | 97            | 1              | 43             | 3482                        | 0              | 3383          | 99              | 13                              | 0                  | 5                   | 8                   |

**Supplementary Table 2:** Summary of side-by-side data

| <b>Pooling Design<br/>(#samples to #pools)</b> | <b>Efficiency</b> | <b>disease<br/>prevalence</b> | <b>Number of<br/>experiments</b> |
|------------------------------------------------|-------------------|-------------------------------|----------------------------------|
| 96 to 25                                       | 3.8               | 2                             | 19                               |
| 96 to 46                                       | 2.1               | 6                             | 15                               |
| 372 to 186                                     | 2                 | 8                             | 1                                |
